# Supplementary material
Source: PubMed Central journal article supplement (PMC2677244)

# **Supplementary Material**

for

**Matrilocal residence is ancestral in Austronesian societies**

Fiona M. Jordan\* (1,2)

Russell D. Gray (3)

Simon J. Greenhill (3)

Ruth Mace (1)

1. Department of Anthropology, University College London, 14 Taviton St, London WC1H0BW, United Kingdom.

2. Centre for the Evolution of Cultural Diversity, University College London, London WC1H0BW, United Kingdom.

3. Department of Psychology, University of Auckland, Private Bag 92019, Auckland, New Zealand.

\* Author and address for correspondence: Department of Anthropology, University College London, 14 Taviton St, London WC1H 0BW, United Kingdom (f.jordan@ucl.ac.uk).

Table 1. Residence data and coding for 135 Austronesian societies.

| society name | ABVD <sup>1</sup> language | primary residence | first years/<br>alternate form <sup>2</sup> | code <sup>3</sup> | geographic location <sup>4</sup> | source <sup>5</sup>             |
|--------------|----------------------------|-------------------|---------------------------------------------|-------------------|----------------------------------|---------------------------------|
| Agta         | Agta                       | ambilocal         | –/–                                         | MP                | Philippines                      | Headland 1993                   |
| Ambon        | Hitu                       | patrilocal        | n.d./ambilocal                              | P                 | Maluku                           | Ethnographic Atlas              |
| Ami          | Central Amis               | matrilocal        | n.d./none                                   | M                 | Taiwan                           | Ethnographic Atlas              |
| Atayal       | Squliq Atayal              | patrilocal        | n.d./matrilocal                             | P                 | Taiwan                           | Ethnographic Atlas              |
| Atoni        | Atoni                      | patrilocal        | –/matrilocal                                | P                 | Nusa Tenggara                    | LeBar 1972a                     |
| Aua          | Wuvulu                     | neolocal          | n.d./none                                   | MP                | Bismarck Arch.                   | Ethnographic Atlas <sup>6</sup> |
| Babar        | North Babar                | matrilocal        | –/–                                         | M                 | Nusa Tenggara                    | Loeb & Broek 1947               |
| Bajau        | Bajo                       | ambilocal         | matrilocal/–                                | MP                | Philippines                      | Ethnographic Atlas              |
| Bali         | Bali                       | patrilocal        | n.d./matrilocal                             | P                 | Nusa Tenggara                    | Ethnographic Atlas              |
| Banggai      | Banggai                    | ambilocal         | –/–                                         | MP                | Sulawesi                         | LeBar 1972b                     |
| Belu         | Tetum                      | matrilocal        | –/–                                         | M                 | Nusa Tenggara                    | Ethnographic Atlas              |
| Bilaan       | Koronadal Blaan            | neolocal          | –/–                                         | MP <sup>7</sup>   | Philippines                      | Ethnographic Atlas              |
| Bisayan      | Aklanon Bisayan            | ambilocal         | –/ambilocal                                 | MP <sup>8</sup>   | Philippines                      | Ethnographic Atlas              |
| Bolaang      | Bolaang Mongondow          | ambilocal         | –/–                                         | MP                | Sulawesi                         | LeBar 1975c                     |
| Bonerate     | Bonerate                   | matrilocal        | –/–                                         | M                 | Nusa Tenggara                    | Broch 1993                      |
| Bontok       | Bontok Guinaang            | patrilocal        | n.d./matrilocal                             | P                 | Philippines                      | Ethnographic Atlas              |
| Buginese     | Buginese Soppeng           | matrilocal        | –/–                                         | M                 | Sulawesi                         | Acciaioli 1993                  |
| Buli         | Buli                       | patrilocal        | matrilocal/–                                | P                 | Halmahera                        | Bubandt 1995                    |
| Bunun        | Bunun                      | patrilocal        | –/–                                         | P                 | Taiwan                           | Ethnographic Atlas              |
| Bwaidoga     | Bwaidoga                   | patrilocal        | –/matrilocal                                | P                 | S.E. PNG                         | Ethnographic Atlas              |
| Carolinian   | Saipan Carolinian          | matrilocal        | –/–                                         | M                 | Micronesia                       | Ethnographic Atlas              |
| Cham         | Phan Rang Cham             | matrilocal        | –/–                                         | M                 | Vietnam                          | Ethnographic Atlas              |
| Chamorro     | Chamorro                   | neolocal          | –/–                                         | MP <sup>7</sup>   | Micronesia                       | Ethnographic Atlas              |
| Choiseul     | Vaghua Choiseul            | patrilocal        | –/matrilocal                                | P                 | Solomon Is.                      | Ethnographic Atlas              |
| Chuuk        | Chuukese                   | matrilocal        | –/patrilocal                                | M                 | Micronesia                       | Ethnographic Atlas              |
| Dahuni       | Suau                       | patrilocal        | –/matrilocal                                | P                 | S.E. PNG                         | Ethnographic Atlas              |
| Dobuan       | Dobuan                     | matrilocal        | –/ambilocal,<br>avunculocal                 | M                 | Massim Arch.                     | Ethnographic Atlas              |
| Dusun        | Ida'an                     | patrilocal        | –/matrilocal                                | P                 | Borneo                           | Ethnographic Atlas              |
| EastFutuna   | Futuna, East               | patrilocal        | ambilocal/matrilocal                        | P                 | Polynesia PO                     | Ethnographic Atlas              |
| EastUvea     | Uvea, East                 | patrilocal        | –/matrilocal                                | P                 | Polynesia PO                     | Ethnographic Atlas              |
| Erai         | Erai                       | ambilocal         | matrilocal/–                                | MP                | Nusa Tenggara                    | Loeb & Broek 1947               |
| Eromanga     | Sye Erromangan             | patrilocal        | –/–                                         | P                 | Vanuatu                          | Ethnographic Atlas              |

| society name | ABVD <sup>1</sup> language | primary residence | first years/<br>alternate form <sup>2</sup> | code <sup>3</sup> | geographic location <sup>4</sup> | source <sup>5</sup>    |
|--------------|----------------------------|-------------------|---------------------------------------------|-------------------|----------------------------------|------------------------|
| Fijian       | Fijian Bau                 | patrilocal        | -/-                                         | P                 | Polynesia                        | Ethnographic Atlas     |
| Gaddang      | Gaddang                    | neolocal          | -/-                                         | MP <sup>7</sup>   | Philippines                      | Wallace 1969           |
| Gayo         | Gayo                       | ambilocal         | -/patrilocal                                | MP                | Sumatra                          | Bowen 1993a            |
| Giman        | Giman                      | patrilocal        | -/-                                         | P                 | Halmahera                        | Teljeur 1990           |
| Hanunoo      | Hanunoo                    | matrilocal        | -/patrilocal                                | M                 | Philippines                      | Ethnographic Atlas     |
| Hawaiian     | Hawaiian                   | ambilocal         | -/-                                         | MP                | Polynesia                        | Ethnographic Atlas     |
| Iban         | Iban                       | ambilocal         | n.d./none                                   | MP                | Borneo                           | Ethnographic Atlas     |
| Ifugao       | Ifugao, Batad              | ambilocal         | n.d./none                                   | MP                | Philippines                      | Ethnographic Atlas     |
| IliMandiri   | Lamaholot Ile Mandiri      | patrilocal        | n.d./matrilocal                             | P                 | Nusa Tenggara                    | Ethnographic Atlas     |
| Ilongot      | Kakiduge:n Ilongot         | matrilocal        | n.d./patrilocal                             | M                 | Philippines                      | Strouthes 1993b        |
| Irarutu      | Kasira Irahutu             | patrilocal        | -/-                                         | P                 | Irian Jaya                       | Matsumura 1997         |
| Javanese     | Javanese                   | neolocal          | -/ambilocal, matrilocal                     | MP <sup>7</sup>   | Java                             | Ethnographic Atlas     |
| Kalinga      | Kalinga Guinaang           | matrilocal        | n.d./ambilocal                              | M                 | Philippines                      | Ethnographic Atlas     |
| Kaoka        | Ghari Guadalcanal          | matrilocal        | patrilocal/patrilocal                       | M                 | Solomon Is.                      | Ethnographic Atlas     |
| Kapinga      | Kapingamarangi             | matrilocal        | patrilocal/-                                | M                 | Micronesia PO                    | Ethnographic Atlas     |
| Kedang       | Kedang                     | patrilocal        | -/ambilocal                                 | P                 | Nusa Tenggara                    | Barnes 1974            |
| Kei          | Elat Kei Besar             | patrilocal        | n.d./matrilocal                             | P                 | Maluku                           | Ethnographic Atlas     |
| Kenyah       | Kenyah Long Anap           | ambilocal         | -/-                                         | MP                | Borneo                           | LeBar 1972d            |
| Kerinci      | Kerinci                    | matrilocal        | -/-                                         | M                 | Sumatra                          | Jaspan 1972            |
| Kiribati     | Kiribati                   | patrilocal        | n.d./matrilocal                             | P                 | Micronesia                       | Ethnographic Atlas     |
| Kisar        | Kisar                      | patrilocal        | -/-                                         | P                 | Nusa Tenggara                    | Loeb & Broek 1947      |
| Kodi         | Kodi                       | patrilocal        | n.d./none                                   | P                 | Nusa Tenggara                    | Ethnographic Atlas     |
| Koobe        | Vitu                       | patrilocal        | n.d./none                                   | P                 | Bismarck Arch.                   | Ethnographic Atlas     |
| Kusaie       | Kusaie                     | patrilocal        | n.d./ambilocal                              | P                 | Micronesia                       | Ethnographic Atlas     |
| Kwaio        | Kwaio                      | patrilocal        | n.d./ambilocal                              | P                 | Solomon Is.                      | Ethnographic Atlas     |
| Lakalai      | Lakalai                    | patrilocal        | n.d./ambilocal                              | P                 | Bismarck Arch.                   | Ethnographic Atlas     |
| Letinese     | Letinese                   | matrilocal        | -/-                                         | M                 | Nusa Tenggara                    | Loeb & Broek 1947      |
| Lifu         | Dehu                       | patrilocal        | n.d./none                                   | P                 | New Caledonia                    | Ethnographic Atlas     |
| Macassarese  | Makassar                   | ambilocal         | -/-                                         | MP                | Sulawesi                         | Ethnographic Atlas     |
| Madurese     | Madurese                   | matrilocal        | -/neolocal                                  | M                 | Java                             | Koentjaraningrat 1972a |
| Malagasy     | Merina Malagasy            | patrilocal        | n.d./none                                   | P                 | Madagascar                       | Ethnographic Atlas     |
| Malay        | Melayu                     | patrilocal        | matrilocal/ambilocal                        | P                 | Malaysia Pen.                    | Ethnographic Atlas     |
| Manam        | Manam                      | patrilocal        | n.d./ambilocal                              | P                 | N. PNG                           | Ethnographic Atlas     |
| Mangaian     | Rarotongan                 | patrilocal        | n.d./matrilocal                             | P                 | Polynesia                        | Ethnographic Atlas     |
| Mangarevan   | Mangareva                  | patrilocal        | n.d./ambilocal                              | P                 | Polynesia                        | Ethnographic Atlas     |

| society name | ABVD <sup>1</sup> language | primary residence | first years/<br>alternate form <sup>2</sup> | code <sup>3</sup> | geographic location <sup>4</sup> | source <sup>5</sup>            |
|--------------|----------------------------|-------------------|---------------------------------------------|-------------------|----------------------------------|--------------------------------|
| Manggarai    | Manggarai                  | patrilocal        | matrilocal/–                                | P                 | Nusa Tenggara                    | Koentjaraningrat 1972b         |
| Manobo       | Western Bukidnon Manobo    | patrilocal        | matrilocal/none                             | P                 | Philippines                      | Ethnographic Atlas             |
| Manus        | Levei                      | patrilocal        | n.d./ambilocal                              | P                 | Bismarck Arch.                   | Ethnographic Atlas             |
| Maori        | Maori                      | patrilocal        | n.d./none                                   | P                 | Polynesia                        | Ethnographic Atlas             |
| Maranao      | Maranao                    | matrilocal        | n.d./ambilocal                              | M                 | Philippines                      | LeBar 1975                     |
| Marquesan    | Marquesan                  | patrilocal        | matrilocal/ambilocal                        | P                 | Polynesia                        | Ethnographic Atlas             |
| Marshallese  | Marshallese                | ambilocal         | n.d./none                                   | M                 | Micronesia                       | Ethnographic Atlas             |
| Mekeo        | Mekeo                      | patrilocal        | n.d./none                                   | P                 | S. PNG                           | Ethnographic Atlas             |
| Melanau      | Melanau Mukah              | matrilocal        | –/–                                         | M                 | Borneo                           | Morris 1993                    |
| Minangkabau  | Minangkabau                | matrilocal        | –/–                                         | M                 | Sumatra                          | Ethnographic Atlas             |
| Misool       | Biga Misool                | ambilocal         | –/–                                         | MP                | Irian Jaya                       | B. Rijmesen pers. comm. 2008   |
| Modang       | Modang                     | matrilocal        | –/ambilocal                                 | M                 | Borneo                           | Guerreiro 1993                 |
| Moken        | Moken                      | neolocal          | matrilocal/patrilocal                       | MP <sup>7</sup>   | Andaman Sea                      | Ethnographic Atlas             |
| Molima       | Molima                     | patrilocal        | n.d./matrilocal                             | P                 | Massim Arch.                     | Ethnographic Atlas             |
| Mori         | Mori                       | matrilocal        | –/neolocal                                  | M                 | Sulawesi                         | LeBar 1972e                    |
| Mota         | Mota                       | matrilocal        | n.d./none                                   | M                 | Vanuatu                          | Ethnographic Atlas             |
| Motu         | Motu                       | patrilocal        | n.d./matrilocal                             | P                 | S. PNG                           | Ethnographic Atlas             |
| Nelemwa      | Nelemwa                    | patrilocal        | –/–                                         | P                 | New Caledonia                    | Isabelle Bril pers. comm. 2008 |
| NgajuDayak   | Dayak Ngaju                | matrilocal        | –/–                                         | M                 | Borneo                           | Ave 1972                       |
| Nguna        | Nguna                      | patrilocal        | –/–                                         | P                 | Vanuatu                          | Facey 1991                     |
| Nias         | Nias                       | patrilocal        | –/matrilocal                                | P                 | Sumatra                          | Beatty 1993                    |
| Nissan       | Nissan                     | patrilocal        | –/neolocal                                  | P                 | Solomon Is.                      | Nachman 1991                   |
| Niue         | Niue                       | patrilocal        | n.d./matrilocal                             | P                 | Polynesia                        | Ethnographic Atlas             |
| Nomoian      | Mortlockese                | matrilocal        | n.d./none                                   | M                 | Micronesia                       | Ethnographic Atlas             |
| Numfor       | Numfor                     | patrilocal        | matrilocal/–                                | P                 | Irian Jaya                       | Kamma 1972                     |
| Ogan         | Ogan                       | matrilocal        | –/ambilocal                                 | M                 | Sumatra                          | Bowen 1993b <sup>9</sup>       |
| OntongJava   | Luangiua                   | matrilocal        | n.d./patrilocal                             | M                 | Solomon Is. PO                   | Ethnographic Atlas             |
| Paiwan       | Paiwan                     | patrilocal        | n.d./matrilocal                             | P                 | Taiwan                           | Ethnographic Atlas             |
| Palauan      | Palauan                    | matrilocal        | patrilocal/patrilocal                       | M                 | Micronesia                       | Ethnographic Atlas             |
| PalawanBatak | Palawan Batak              | matrilocal        | n.d./none                                   | M                 | Philippines                      | Warren 1975                    |
| Ponape       | Ponapean                   | matrilocal        | n.d./matrilocal                             | M                 | Micronesia                       | Ethnographic Atlas             |
| Punan        | Punan Kelai                | ambilocal         | –/–                                         | MP                | Borneo                           | Ethnographic Atlas             |
| Puyuma       | Puyuma                     | matrilocal        | n.d./patrilocal                             | M                 | Taiwan                           | Ethnographic Atlas             |
| Rapanui      | Rapanui Easter Island      | patrilocal        | n.d./matrilocal                             | P                 | Polynesia                        | Ethnographic Atlas             |
| Rennellese   | Rennellese                 | patrilocal        | –/–                                         | P                 | Solomon Is. PO                   | Birket-Smith 1991              |

| society name | ABVD <sup>1</sup> language | primary residence | first years/<br>alternate form <sup>2</sup> | code <sup>3</sup> | geographic location <sup>4</sup> | source <sup>5</sup> |
|--------------|----------------------------|-------------------|---------------------------------------------|-------------------|----------------------------------|---------------------|
| Roti         | Roti Termanu               | patrilocal        | n.d./none                                   | P                 | Nusa Tenggara                    | Ethnographic Atlas  |
| Rotuman      | Rotuman                    | matrilocal        | n.d./none                                   | M                 | Polynesia                        | Ethnographic Atlas  |
| Roviana      | Roviana                    | patrilocal        | —/—                                         | P                 | Solomon Is.                      | Somerville 1897     |
| SagadaIgorot | Kankanay, Northern         | ambilocal         | n.d./none                                   | MP                | Philippines                      | Ethnographic Atlas  |
| Saisiat      | Saisiat                    | patrilocal        | —/matrilocal                                | P                 | Taiwan                           | Mabuchi 1960        |
| Samoaan      | Samoaan                    | ambilocal         | matrilocal/patrilocal                       | MP                | Polynesia                        | Ethnographic Atlas  |
| SantaCruz    | Malo, Santa Cruz           | patrilocal        | n.d./ambilocal                              | P                 | Solomon Is. PO                   | Ethnographic Atlas  |
| Sengseng     | Sengseng                   | neolocal          | —/—                                         | MP <sup>7</sup>   | Bismarck Arch.                   | Chowning 1991       |
| Sika         | Sika                       | ambilocal         | matrilocal/none                             | MP                | Nusa Tenggara                    | Fox 1972            |
| Simbo        | Simbo                      | ambilocal         | matrilocal/none                             | MP                | Solomon Is.                      | Ethnographic Atlas  |
| Subanun      | Subanun, Sindangan         | ambilocal         | matrilocal/—                                | MP                | Philippines                      | Ethnographic Atlas  |
| Sugbuhanon   | Cebuano                    | neolocal          | neolocal                                    | MP <sup>7</sup>   | Philippines                      | Ethnographic Atlas  |
| Sumbanese    | Kambara                    | patrilocal        | n.d./none                                   | P                 | Nusa Tenggara                    | Ethnographic Atlas  |
| Sumbawanese  | Bima                       | neolocal          | matrilocal/none                             | MP <sup>7</sup>   | Nusa Tenggara                    | Ethnographic Atlas  |
| Sundanese    | Sunda                      | ambilocal         | —/neolocal                                  | MP                | Java                             | Strouthes 1993c     |
| Tagbanua     | Tagbanwa, Aborlan          | matrilocal        | n.d./patrilocal                             | M                 | Philippines                      | Ethnographic Atlas  |
| Tahitian     | Tahitian Modern            | ambilocal         | n.d./none                                   | MP                | Polynesia                        | Ethnographic Atlas  |
| Tanimbarese  | Selaru                     | patrilocal        | matrilocal/none                             | P                 | Nusa Tenggara                    | Ethnographic Atlas  |
| Tikopia      | Tikopia                    | patrilocal        | n.d./none                                   | P                 | Solomon Is. PO                   | Ethnographic Atlas  |
| TobaBatak    | Toba Batak                 | patrilocal        | n.d./ambilocal                              | P                 | Sumatra                          | Ethnographic Atlas  |
| Tokelau      | Tokelau                    | matrilocal        | n.d./patrilocal                             | M                 | Polynesia PO                     | Ethnographic Atlas  |
| Tongan       | Tongan                     | patrilocal        | n.d./matrilocal                             | P                 | Polynesia                        | Ethnographic Atlas  |
| Tongarevan   | Penrhyn                    | patrilocal        | n.d./matrilocal                             | P                 | Polynesia                        | Ethnographic Atlas  |
| Toradja      | Tae' S.Toraja              | matrilocal        | n.d./none                                   | M                 | Sulawesi                         | Ethnographic Atlas  |
| Trobriand    | Kilivila                   | matrilocal        | n.d./patrilocal                             | M                 | Massim Arch.                     | Ethnographic Atlas  |
| Tsou         | Tsou                       | patrilocal        | n.d./none                                   | P                 | Taiwan                           | Mabuchi 1960        |
| Tuamotu      | Tuamotu                    | ambilocal         | n.d./ambilocal                              | MP                | Polynesia                        | Ethnographic Atlas  |
| Tuvalu       | Tuvalu                     | patrilocal        | n.d./matrilocal                             | P                 | Polynesia PO                     | Ethnographic Atlas  |
| Ulawan       | Sa'a                       | patrilocal        | n.d./none                                   | P                 | Solomon Is.                      | Ethnographic Atlas  |
| Waropen      | Waropen                    | patrilocal        | n.d./none                                   | P                 | West Papua                       | Ethnographic Atlas  |
| Wogeo        | Wogeo                      | patrilocal        | n.d./none                                   | P                 | N. PNG                           | Ethnographic Atlas  |
| Woleaian     | Woleaian                   | ambilocal         | n.d./none                                   | MP                | Micronesia                       | Ethnographic Atlas  |
| Yami         | Yami                       | patrilocal        | n.d./none                                   | P                 | Taiwan                           | Ethnographic Atlas  |

Notes to table

1. Austronesian Basic Vocabulary Database, <http://language.psy.auckland.ac.nz/austronesian/>
2. –, no information; n.d., no difference from primary residence
3. M, matrilocal; P, patrilocal; MP, ambilocal or other.
4. Arch., Archipelago; Is., Island; N., north; PNG, Papua New Guinea; PO, Polynesian Outliers; S.E., southeast; S., south;
5. Ethnographic Atlas denotes information from the J. Gray (1999) updated version of Murdock's (1967) publication.
6. "No common residence", coded as MP.
7. "Neolocal", coded as MP.
8. EA indicated neolocal, coded ambilocal on basis of more detailed ethnographic information (Strouthes 1993).
9. With reference to the Semende.

## SUPPLEMENTAL REFERENCES

- Acciaoli, G. 1993 Bugis. In *Encyclopedia of World Cultures*, vol. 5, East and Southeast Asia (ed. P. Hockings), pp. 48-52. New York: GK Hall & Co.
- Ave, J. B. 1972 Kalimantan Dayaks. In *Ethnic Groups of Insular Southeast Asia*, vol. 1, Indonesia, Andaman Islands, and Madagascar (ed. F. M. LeBar), pp. 185-187. New Haven: HRAF Press.
- Barnes, R. H. 1974 *Kédang : a study of the collective thought of an eastern Indonesian people*. Oxford: Clarendon Press.
- Bartels, D. 1993 Ambonese. In *Encyclopedia of World Cultures*, vol. 5, East and Southeast Asia (ed. P. Hockings), pp. 16-19. New York: GK Hall & Co.
- Beatty, A. W. 1993 Nias. In *Encyclopedia of World Cultures*, vol. 5, East and Southeast Asia (ed. P. Hockings), pp. 194-197. New York: GK Hall & Co.
- Birket-Smith, K. 1991 Rennell Island. In *Encyclopedia of World Cultures*, vol. 2, Oceania (ed. T. E. Hays). New York: GK Hall & Co.
- Bowen, J. R. 1993a Gayo. In *Encyclopedia of World Cultures*, vol. 5, East and Southeast Asia (ed. P. Hockings), pp. 88-90. New York: GK Hall & Co.
- Bowen, J. R. 1993b Ogan-Besemah. In *Encyclopedia of World Cultures*, vol. 5, East and Southeast Asia (ed. P. Hockings), pp. 197-199. New York: GK Hall & Co.
- Broch, H. B. 1993 Bonerate. In *Encyclopedia of World Cultures*, vol. 5, East and Southeast Asia (ed. P. Hockings), pp. 43-46. New York: GK Hall & Co.
- Chowning, A. 1991 Sengseng. In *Encyclopedia of World Cultures*, vol. 2, Oceania (ed. T. E. Hays). New York: GK Hall & Co.
- Cunningham, C. E. 1993 Atoni. In *Encyclopedia of World Cultures*, vol. 5, East and Southeast Asia (ed. P. Hockings), pp. 26-29. New York: GK Hall & Co.
- Facey, E. 1991 Nguna. In *Encyclopedia of World Cultures*, vol. 2, Oceania (ed. T. E. Hays). New York: GK Hall & Co.
- Fox, J. J. 1972 Sikanese. In *Ethnic Groups of Insular Southeast Asia*, vol. 1, Indonesia, Andaman Islands, and Madagascar (ed. F. M. LeBar), pp. 88-90. New Haven: HRAF Press.
- Gray, J. P. 1999 A corrected ethnographic atlas. *World Cultures* **10**, 24-136.
- Guerreiro, A. J. 1993 Modang. In *Encyclopedia of World Cultures*, vol. 5, East and Southeast Asia (ed. P. Hockings), pp. 185-187. New York: GK Hall & Co.
- Headland, T. N. 1993 Agta. In *Encyclopedia of World Cultures*, vol. 5, East and Southeast

- Asia (ed. P. Hockings), pp. 4-6. New York: GK Hall & Co.
- Jaspan, M. A. 1972 Kerintji. In *Ethnic Groups of Insular Southeast Asia*, vol. 1, Indonesia, Andaman Islands, and Madagascar (ed. F. M. LeBar), pp. 29-30. New Haven: HRAF Press.
- Kamma, F. C. 1972 *Koreri: Messianic movements in the Biak-Numfor culture area*. The Hague: Nijhoff.
- Koentjaraningrat. 1972a Madurese. In *Ethnic Groups of Insular Southeast Asia*, vol. 1, Indonesia, Andaman Islands, and Madagascar (ed. F. M. LeBar), pp. 53-54. New Haven: HRAF Press.
- Koentjaraningrat. 1972b Manggarai. In *Ethnic Groups of Insular Southeast Asia*, vol. 1, Indonesia, Andaman Islands, and Madagascar (ed. F. M. LeBar), pp. 81-83. New Haven: HRAF Press.
- LeBar, F. M. 1972a Atoni. In *Ethnic Groups of Insular Southeast Asia*, vol. 1, Indonesia, Andaman Islands, and Madagascar (ed. F. M. LeBar), pp. 103-105. New Haven: HRAF Press.
- LeBar, F. M. 1972b Banggai. In *Ethnic Groups of Insular Southeast Asia*, vol. 1, Indonesia, Andaman Islands, and Madagascar (ed. F. M. LeBar), pp. 139-140. New Haven: HRAF Press.
- LeBar, F. M. 1972c Bolaang Mongondow. In *Ethnic Groups of Insular Southeast Asia*, vol. 1, Indonesia, Andaman Islands, and Madagascar (ed. F. M. LeBar), pp. 127-128. New Haven: HRAF Press.
- LeBar, F. M. 1972d Kenyah-Kayan-Kajang. In *Ethnic Groups of Insular Southeast Asia*, vol. 1, Indonesia, Andaman Islands, and Madagascar (ed. F. M. LeBar), pp. 168-173. New Haven: HRAF Press.
- LeBar, F. M. 1972e Mori. In *Ethnic Groups of Insular Southeast Asia*, vol. 1, Indonesia, Andaman Islands, and Madagascar (ed. F. M. LeBar). New Haven: HRAF Press.
- LeBar, F. M. 1975 Maranao. In *Ethnic Groups of Insular Southeast Asia*, vol. 2, Philippines and Formosa (ed. F. M. LeBar). New Haven: HRAF Press.
- Morris, H. S. 1993 Melanau. In *Encyclopedia of World Cultures*, vol. 5, East and Southeast Asia (ed. P. Hockings), pp. 177-181. New York: GK Hall & Co.
- Murdock, G. P. 1967 Ethnographic atlas: A summary. *Ethnology* 6, 109-236.
- Nachman, S. R. 1991 Nissan. In *Encyclopedia of World Cultures*, vol. 2, Oceania (ed. T. E. Hays). New York: GK Hall & Co.
- Sather, C. 1993 Bajau. In *Encyclopedia of World Cultures*, vol. 5, East and Southeast Asia



- (ed. P. Hockings), pp. 30-35. New York: GK Hall & Co.
- Strouthes, D. 1993a Bisaya. In *Encyclopedia of World Cultures*, vol. 5, East and Southeast Asia (ed. P. Hockings), pp. 42-43. New York: GK Hall & Co.
- Strouthes, D. 1993b Ilongot. In *Encyclopedia of World Cultures*, vol. 5, East and Southeast Asia (ed. P. Hockings), pp. 101-102. New York: GK Hall & Co.
- Strouthes, D. 1993c Sundanese. In *Encyclopedia of World Cultures*, vol. 5, East and Southeast Asia (ed. P. Hockings), pp. 246-247. New York: GK Hall & Co.
- Teljeur, D. 1990 *The Symbolic System of the Giman of South Halmahera*. Dordrecht: Foris.
- Warren, C. P. 1975 Batak. In *Ethnic Groups of Insular Southeast Asia*, vol. 2, Philippines and Formosa (ed. F. M. LeBar), pp. 68-70. New Haven: HRAF Press.

Figure S1. Majority-rule consensus phylogeny of 135 Austronesian societies as in Figure 2, here depicted with branch lengths proportional to the amount of linguistic change. Scale represents the mean number of substitutions across all trees in the posterior tree distribution.

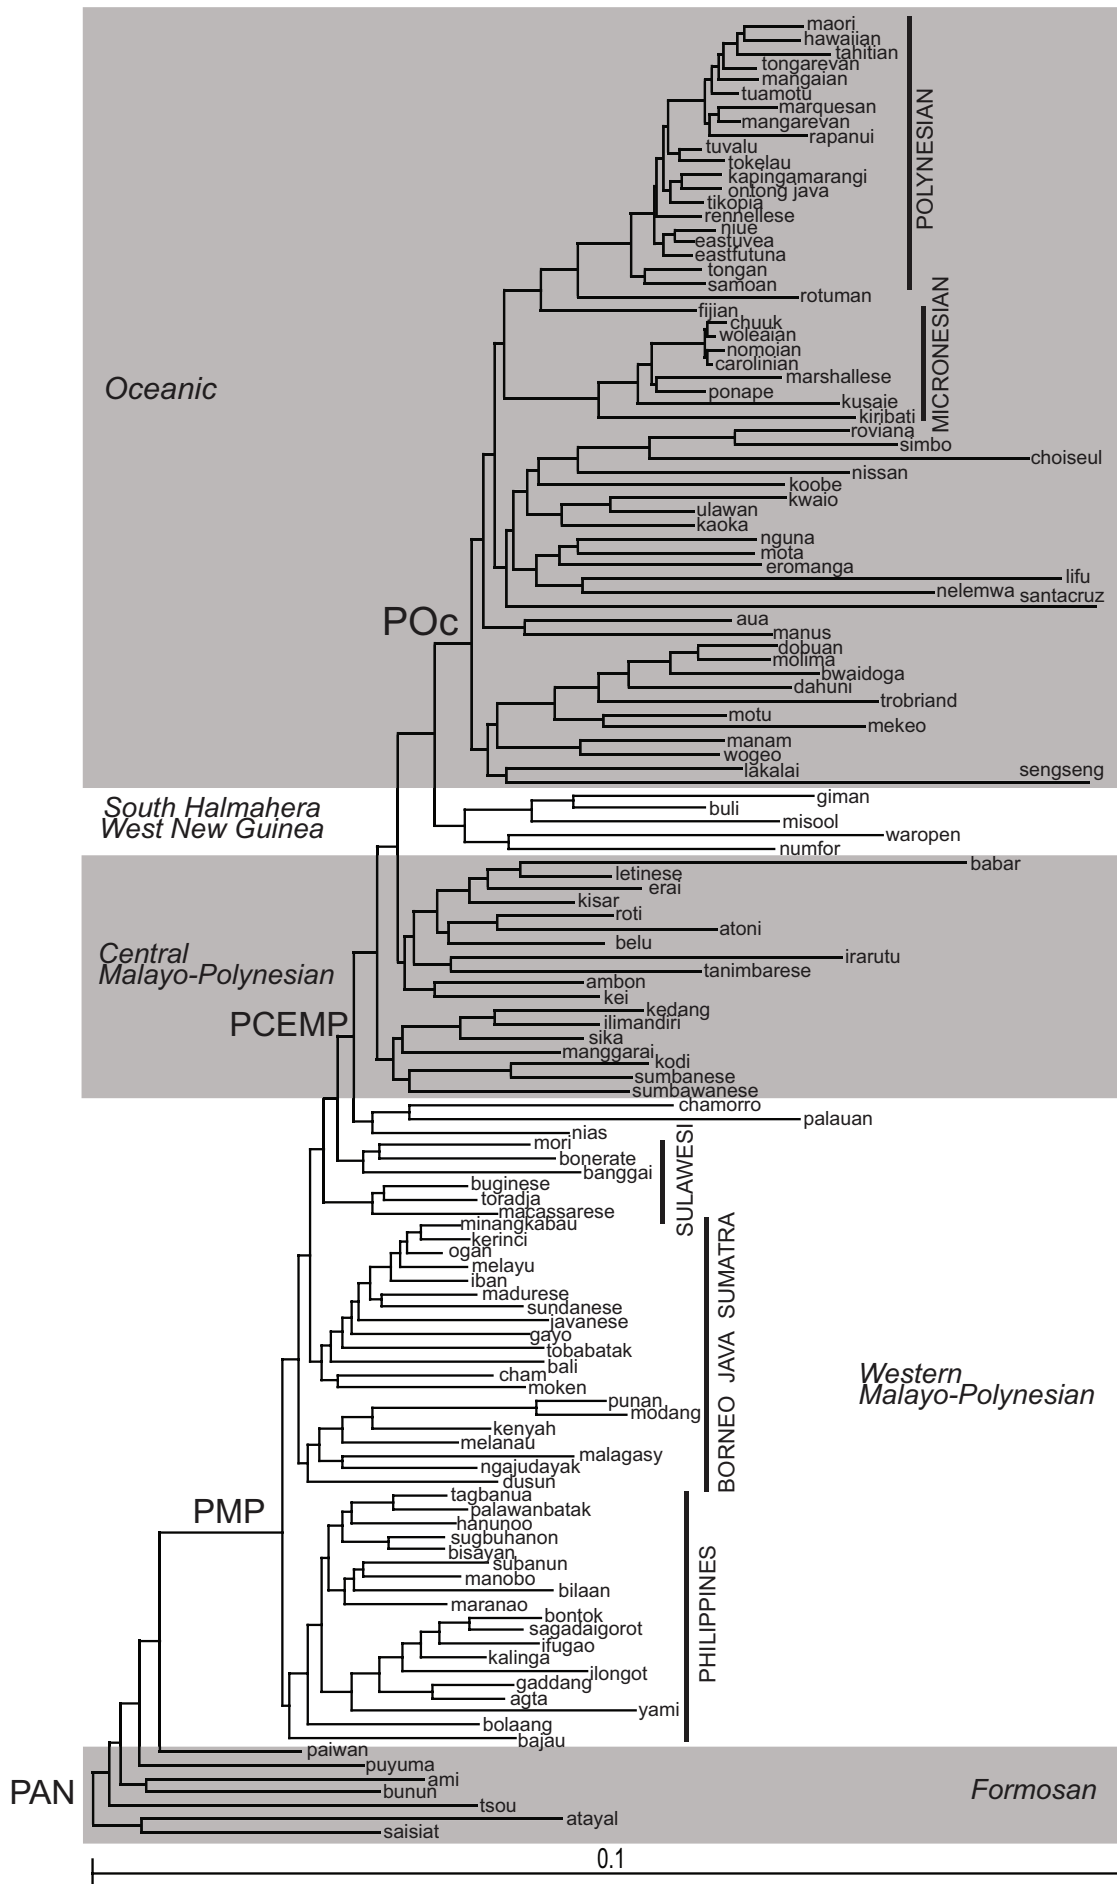

Supplement: rspb20090088s06.pdf [file rspb20090088s06.pdf]
